# Supplementary material for: Adherence and Acceptability of an Oral Antibiotic Used for the Prevention of Pediatric Urinary Tract Infection in Japan
Source: PubMed Central journal article supplement (PMC8000562; doi:10.3390/pharmaceutics13030345), 2021-03-06
Supplement: pharmaceutics-13-00345-s001.pdf [file pharmaceutics-13-00345-s001.pdf]

# Supplementary Materials: Adherence and Acceptability of an Oral Antibiotic Used for the Prevention of Pediatric Urinary Tract Infection in Japan

Jumpei Saito, Sayaka Miyamoto, Mayumi Yamada, Akimasa Yamatani, Fabrice Ruiz \* and Thibault Vallet

**Table S1.** Patient and medicine characteristics of the 364 evaluations of antibacterials formulated as powder or granules in children aged 0 to 15 years within the dataset that gave rise to the acceptability reference framework.

| Patients and Medicines Characteristics                                                                              | n (%)    |
|---------------------------------------------------------------------------------------------------------------------|----------|
| <b>Sex of patients</b>                                                                                              |          |
| Girl                                                                                                                | 160 (45) |
| Boy                                                                                                                 | 194 (55) |
| missing data                                                                                                        | 10       |
| <b>Age group of patients</b>                                                                                        |          |
| 0 to 2 years                                                                                                        | 162 (45) |
| 3 to 5 years                                                                                                        | 118 (33) |
| 6 to 11 years                                                                                                       | 66 (18)  |
| 12 to 17 years                                                                                                      | 11 (4)   |
| missing data                                                                                                        | 7        |
| <b>Treatment exposure</b>                                                                                           |          |
| Previous exposure                                                                                                   | 159 (44) |
| First exposure                                                                                                      | 203 (56) |
| missing data                                                                                                        | 2        |
| <b>Type of care</b>                                                                                                 |          |
| Outpatients                                                                                                         | 228 (63) |
| Inpatients                                                                                                          | 136 (37) |
| <b>Country</b>                                                                                                      |          |
| France                                                                                                              | 197 (54) |
| Morocco                                                                                                             | 88 (24)  |
| Norway                                                                                                              | 42 (12)  |
| England                                                                                                             | 17 (5)   |
| Germany                                                                                                             | 12 (3)   |
| Japan                                                                                                               | 8 (2)    |
| <b>5<sup>th</sup> level (chemical substance) of the Anatomical Therapeutic Chemical (ATC) classification system</b> |          |
| Amoxicillin                                                                                                         | 87 (24)  |
| Co-amoxiclav                                                                                                        | 81 (22)  |
| Josamycin                                                                                                           | 49 (14)  |
| Cefpodoxime                                                                                                         | 45 (12)  |
| Cefixime                                                                                                            | 45 (12)  |
| Phenoxymethylpenicillin                                                                                             | 27 (7)   |
| Clarithromycin                                                                                                      | 9 (3)    |
| Cefalexin                                                                                                           | 8 (2)    |
| Azithromycin                                                                                                        | 4 (1)    |
| Erythromycin                                                                                                        | 3 (1)    |
| Clindamycin                                                                                                         | 3 (1)    |
| Cefaclor                                                                                                            | 2 (0.5)  |
| Cefadroxil                                                                                                          | 1 (0.5)  |

---

**Dosage form categories**

|         |          |
|---------|----------|
| Powder  | 243 (67) |
| Granule | 121 (33) |

---
